# Supplementary material for: Emergence of a New Strain of DENV-2 in South America: Introduction of the Cosmopolitan Genotype through the Brazilian-Peruvian Border
Source: Preprints.org preprint supplement (doi:10.20944/preprints202305.1014.v1), 2023-05-15
Supplement: Supplementary file 1 [file supplementary]

## Sheet: Planilha1
	Supplementary Table: Sequences included in the phylogenetic analysis
	A. NUMBER	COUNTRY	COLLECTION DATE	GENOTYPE	LINEAGE
	OQ511273	Brazil	2021-03-10	Cosmopolitan	5
	OM744143	Brazil	2021-11-29
	OQ511271	Brazil	2021-02-01
	OQ511274	Brazil	2021-02-27
	OQ511272	Brazil	2021-02-24
	OQ511275	Brazil	2021-02-26
	OM791800	Peru	2019
	OM791801	Peru	2019
	LC436672	Bangladesh	2017
	MN328061	Bangladesh	2019
	LC436673	Bangladesh	2017
	LC436674	Bangladesh	2017
	MW512387	Singapore	2013
	LC410191	Thailand	2017
	KU517847	Philippines	2015
	KX372564	Australia	2015
	KX452040	Malaysia	2014
	MK564480	China	2016
	MH110588	China	2017
	MW512491	Singapore	2019
	MK513444	Singapore	2015
	EU179857	Brunei	2005
	KC762669	Indonesia	2007
	HM488257	Guam	2001
	KX380830	Singapore	2013		4
	KX380819	Singapore	2012
	KX380809	Singapore	2012
	KY921904	Singapore	2014
	MW512379	Singapore	2012
	KX380836	Singapore	2013
	KU517846	Indonesia	2014
	MW512466	Singapore	2016
	AY858036	Indonesia	2004
	MK578532	China	2016
	MW512354	Singapore	2009		2
	KM279597	Singapore	2012
	JN851113	Singapore	2006
	KM279604	Singapore	2008
	KU509272	Thailand	2009
	KC762660	Indonesia	2007
	KX452015	Malaysia	2014
	KC762678	Indonesia	2010
	MW512414	Singapore	2014
	KU517845	Papua New Guinea	2013
	MH985858	Australia	2016
	KC762658	Indonesia	2007
	EU081177	Singapore	2005		-
	EU081180	Singapore	2005		-
	JN851124	Singapore	2005		-
	KC762672	Indonesia	2008		3
	KC762680	Indonesia	2010
	JX470186	China	2010
	EU482640	Vietnam	2006
	EU179859	Brunei	2006
	MW512376	Singapore	2012
	KT187557	China	2014
	MG189962	Tanzania	2014
	AY858035	Indonesia	2004
	KU365902	Taiwan	2015
	MW512450	Singapore	2016
	MF004385	France	2014
	AY037116	Australia	1993		-
	KC964094	China	1993		-
	EF051521	China	2001		1
	KU509274	Philippines	2010
	KF744397	Philippines	2001
	MW512489	Singapore	2018
	DQ645553	Taiwan	2002
	DQ645554	Taiwan	2002
	KF744398	Philippines	2005
	JN851131	Singapore	2005
	MW512409	Singapore	2013
	AB189122	Indonesia	1998
	GQ398264	Indonesia	1976		-
	EU056810	Burkina Faso	1983		-
	GU131843	Burkina Faso	1986		-
	GQ398262	Indonesia	1976		-
	KJ830750	Saudi Arabia	2014		Indian sub-continent
	KJ010186	Pakistan	2013
	GQ252677	Sri Lanka	2003
	MF156247	China	2015
	MH110592	China	2017
	MH822948	India	2012
	JQ955623	India	2009
	MW512372	Singapore	2012
	MW512490	Singapore	2019
	MG779194	Kenya	2017
	KY672948	China	2013	Asian I	-
	KY849763	Laos	2010		-
	DQ181797	Thailand	2001		-
	GU131897	Cambodia	2007		-
	FM210211	Vietnam	2003		-
	DQ181798	Thailand	1999		-
	GQ868545	Thailand	1996		-
	DQ181802	Thailand	1988		-
	DQ181805	Thailand	1979		-
	AJ487271	Thailand	1974		-
	NC_001474	Thailand	1964		-
	HQ891023	Taiwan	2008	Asian II	-
	HQ891024	Taiwan	2008		-
	AF204177	China	1989		-
	AF038403	AF038403	1944		-
	FJ906959	Papua New Guinea	2008		-
	KF704358	Cuba	1981		-
	KF744400	Philippines	2000		-
	KF744407	Philippines	1996		-
	KJ734727	Taiwan	2014		-
	EU482600	Nicaragua	2005	Asian-American	-
	GQ199868	Nicaragua	2007		-
	FJ898461	Belize	2002		-
	AY702036	Cuba	1997		-
	EU687217	Puerto Rico	2005		-
	GQ868596	Venezuela	1991		-
	JX669488	Brazil	2002		-
	GQ868540	Venezuela	1990		-
	EU569704	Puerto Rico	1986		-
	GQ398290	Puerto Rico	1994		-
	JN819418	Vietnam	1988		-
	AF119661	China	1985		-
	DQ181801	Thailand	1990		-
	AF100469	Mexico	1992	American	-
	GQ868589	Mexico	1983		-
	EU056811	Peru	1995		-
	GQ868592	Colombia	1986		-
	HM582107	American Samoa	1972		-
	HM582110	French Polynesia	1973		-
	HM582117	Tonga	1974		-
	EU056812	Puerto Rico	1977		-
	GQ398257	Indonesia	1977		-
